# Supplementary material for: Simulating the Evolution of Functional Brain Networks in Alzheimer’s Disease: Exploring Disease Dynamics from the Perspective of Global Activity
Source: PubMed Central journal article supplement (PMC5039719; doi:10.1038/srep34156), 2016-09-28
Supplement: srep34156-s1.pdf [file srep34156-s1.pdf]

---

## **Simulating the Evolution of Functional Brain Networks in Alzheimer's Disease:**

### **Exploring Disease Dynamics from the Perspective of Global Activity**

Wei Li<sup>1,2</sup>, Miao Wang<sup>3</sup>, Wenzhen Zhu<sup>4</sup>, Yuanyuan Qin<sup>4</sup>, Yue Huang<sup>5</sup>, Xi Chen<sup>1,2,\*</sup>

1. School of Automation, Huazhong University of Science and Technology, Wuhan, 430074, P. R. China.

2. Image Processing and Intelligent Control Key Laboratory of Education Ministry of China, Wuhan, 430074, P. R. China.

3. China Ship Development and Design Center, Wuhan, 430064, P. R. China.

4. Department of Radiology, Tongji Hospital, Tongji Medical College, Huazhong University of Science and Technology, Wuhan, 430074, P. R. China.

5. School of Electrical and Electronic Engineering, East China Jiaotong University, Nanchang, 330013, P. R. China.

\*Corresponding author E-mail: chenxi@mail.hust.edu.cn, Tel: +8618971142226.

---

**S1. The names of the ROIs in the AAL atlas**

|                         |                      |                         |
|-------------------------|----------------------|-------------------------|
| 1 Precentral_L          | 31 Cingulum_Ant_L    | 61 Parietal_Inf_L       |
| 2 Precentral_R          | 32 Cingulum_Ant_R    | 62 Parietal_Inf_R       |
| 3 Frontal_Sup_L         | 33 Cingulum_Mid_L    | 63 SupraMarginal_L      |
| 4 Frontal_Sup_R         | 34 Cingulum_Mid_R    | 64 SupraMarginal_R      |
| 5 Frontal_Sup_Orb_L     | 35 Cingulum_Post_L   | 65 Angular_L            |
| 6 Frontal_Sup_Orb_R     | 36 Cingulum_Post_R   | 66 Angular_R            |
| 7 Frontal_Mid_L         | 37 Hippocampus_L     | 67 Precuneus_L          |
| 8 Frontal_Mid_R         | 38 Hippocampus_R     | 68 Precuneus_R          |
| 9 Frontal_Mid_Orb_L     | 39 ParaHippocampal_L | 69 Paracentral_Lobule_L |
| 10 Frontal_Mid_Orb_R    | 40 ParaHippocampal_R | 70 Paracentral_Lobule_R |
| 11 Frontal_Inf_Oper_L   | 41 Amygdala_L        | 71 Caudate_L            |
| 12 Frontal_Inf_Oper_R   | 42 Amygdala_R        | 72 Caudate_R            |
| 13 Frontal_Inf_Tri_L    | 43 Calcarine_L       | 73 Putamen_L            |
| 14 Frontal_Inf_Tri_R    | 44 Calcarine_R       | 74 Putamen_R            |
| 15 Frontal_Inf_Orb_L    | 45 Cuneus_L          | 75 Pallidum_L           |
| 16 Frontal_Inf_Orb_R    | 46 Cuneus_R          | 76 Pallidum_R           |
| 17 Rolandic_Oper_L      | 47 Lingual_L         | 77 Thalamus_L           |
| 18 Rolandic_Oper_R      | 48 Lingual_R         | 78 Thalamus_R           |
| 19 Supp_Motor_Area_L    | 49 Occipital_Sup_L   | 79 Heschl_L             |
| 20 Supp_Motor_Area_R    | 50 Occipital_Sup_R   | 80 Heschl_R             |
| 21 Olfactory_L          | 51 Occipital_Mid_L   | 81 Temporal_Sup_L       |
| 22 Olfactory_R          | 52 Occipital_Mid_R   | 82 Temporal_Sup_R       |
| 23 Frontal_Sup_Medial_L | 53 Occipital_Inf_L   | 83 Temporal_Pole_Sup_L  |
| 24 Frontal_Sup_Medial_R | 54 Occipital_Inf_R   | 84 Temporal_Pole_Sup_R  |
| 25 Frontal_Mid_Orb_L    | 55 Fusiform_L        | 85 Temporal_Mid_L       |
| 26 Frontal_Mid_Orb_R    | 56 Fusiform_R        | 86 Temporal_Mid_R       |

|             |                   |                        |
|-------------|-------------------|------------------------|
| 27 Rectus_L | 57 Postcentral_L  | 87 Temporal_Pole_Mid_L |
| 28 Rectus_R | 58 Postcentral_R  | 88 Temporal_Pole_Mid_R |
| 29 Insula_L | 59 Parietal_Sup_L | 89 Temporal_Inf_L      |
| 30 Insula_R | 60 Parietal_Sup_R | 90 Temporal_Inf_R      |

## S2. The definitions of the topological properties mentioned in the paper

The characteristic path length ( $L$ ) represents the mean shortest path length of all nodes:

$$L = \frac{2}{N(N-1)} \sum_{i>j} dis_{i,j}$$

Where the  $dis_{i,j}$  represents the shortest path length between node  $i$  and node  $j$

The clustering coefficient of node  $i$  is defined as:

$$C_i = \frac{n}{k(k-1)/2}$$

Where the  $k$  represents the number of neighbors of node  $i$ , and the  $n$  represents the number of edges among the neighbors of node  $i$ . The mean clustering coefficient is defined as the average value of the clustering coefficients of all nodes:

$$C = \frac{1}{N} \sum C_i$$

For convenience, we call the “mean clustering coefficient” the “clustering coefficient” in our paper.

The small worldness is usually defined as the ratio of normalized mean clustering coefficient and normalized characteristic path length:

$$S = \frac{C/C_0}{L/L_0}$$

Where the  $C_0$  and  $L_0$  represent the mean clustering coefficient and characteristic path length of a surrogate random network.

---

The global efficiency of a network is calculated as:

$$E_g = \frac{1}{N(N-1)} \sum_{i \neq j} \frac{1}{dis_{i,j}}$$

Where the  $N$  represents the scale of the network, i.e. the number of nodes in the network.

### **S3. The ten regions that suffered most in the simulation of evolution**

| AAL ID | Region                                                      |
|--------|-------------------------------------------------------------|
| 57     | Postcentral gyrus, left hemisphere                          |
| 2      | Precentral gyrus, right hemisphere                          |
| 1      | Precentral gyrus, left hemisphere                           |
| 7      | Middle frontal gyrus, lateral part, left hemisphere         |
| 4      | Superior frontal gyrus, dorsolateral part, right hemisphere |
| 8      | Middle frontal gyrus, lateral part, right hemisphere        |
| 89     | Inferior temporal gyrus, left hemisphere                    |
| 81     | Superior temporal gyrus, left hemisphere                    |
| 18     | Rolandic operculum, right hemisphere                        |
| 29     | Insula, left hemisphere                                     |

### **S4. Experimental results in the independent cohort *I***

As shown in Fig S1, the topological differences between the NC and AD groups were consistent with those in the primary cohort. After evolution, the topological profile of the AD group in the independent cohort *I* was well captured by the SN group.

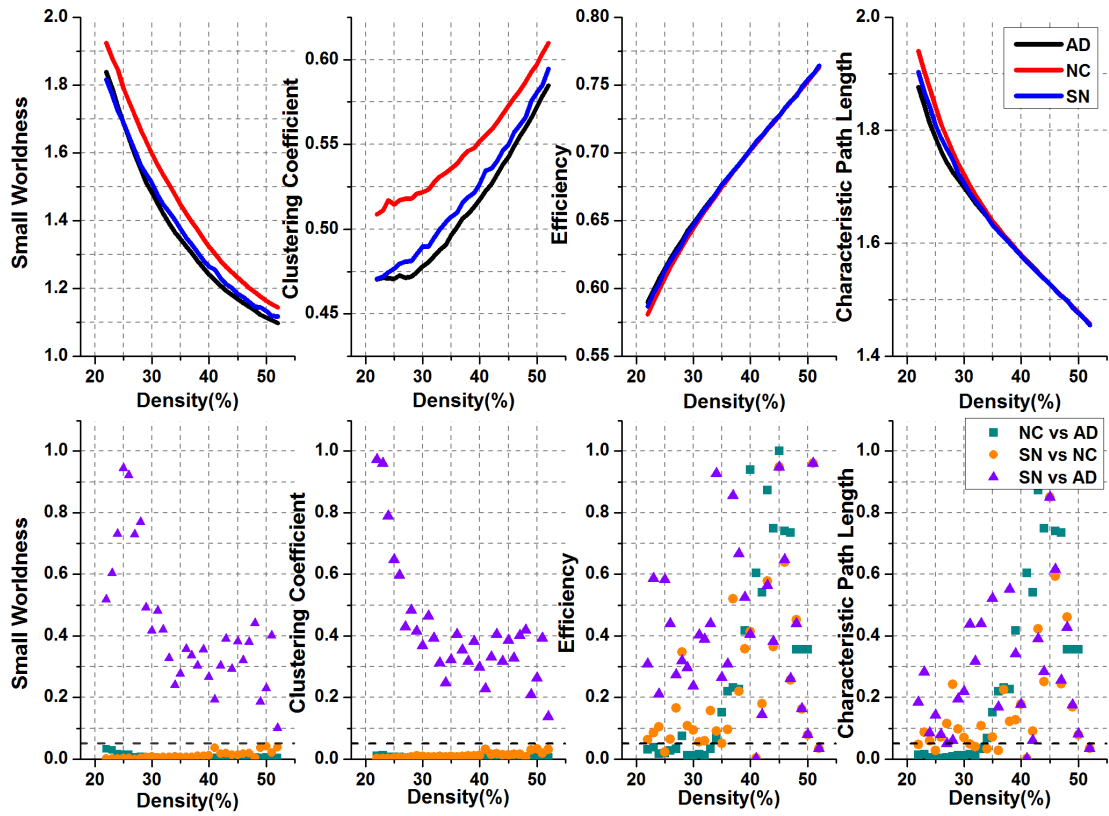

Fig S1

Meanwhile, the nodal degree distribution of the SN group approached closely that of the AD group from the initial NC group (Fig S2).

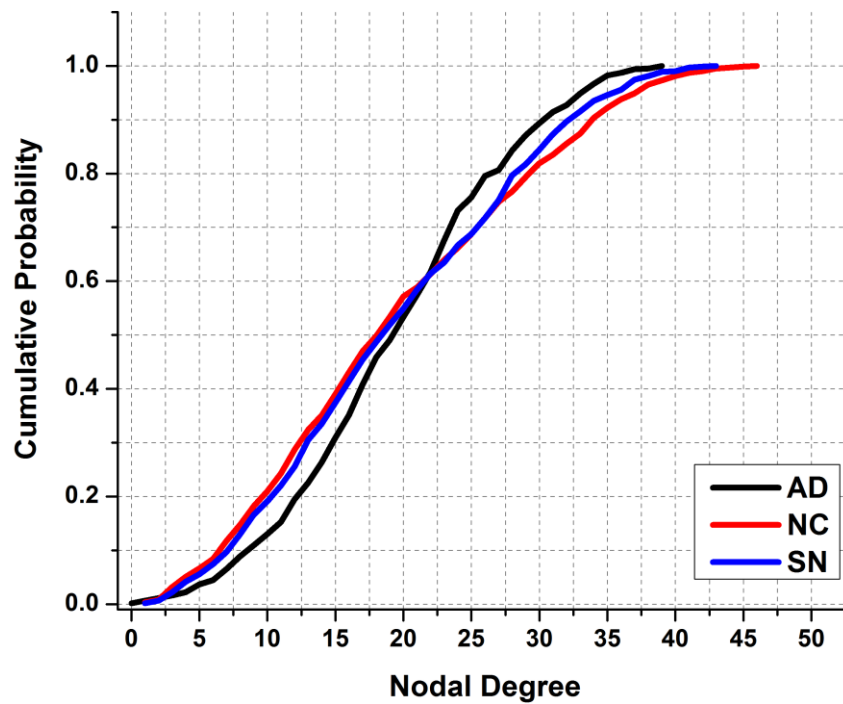

Fig S2

For comparison, after random evolution, the RN group could not fully capture the performance of the real AD group (Fig S3).

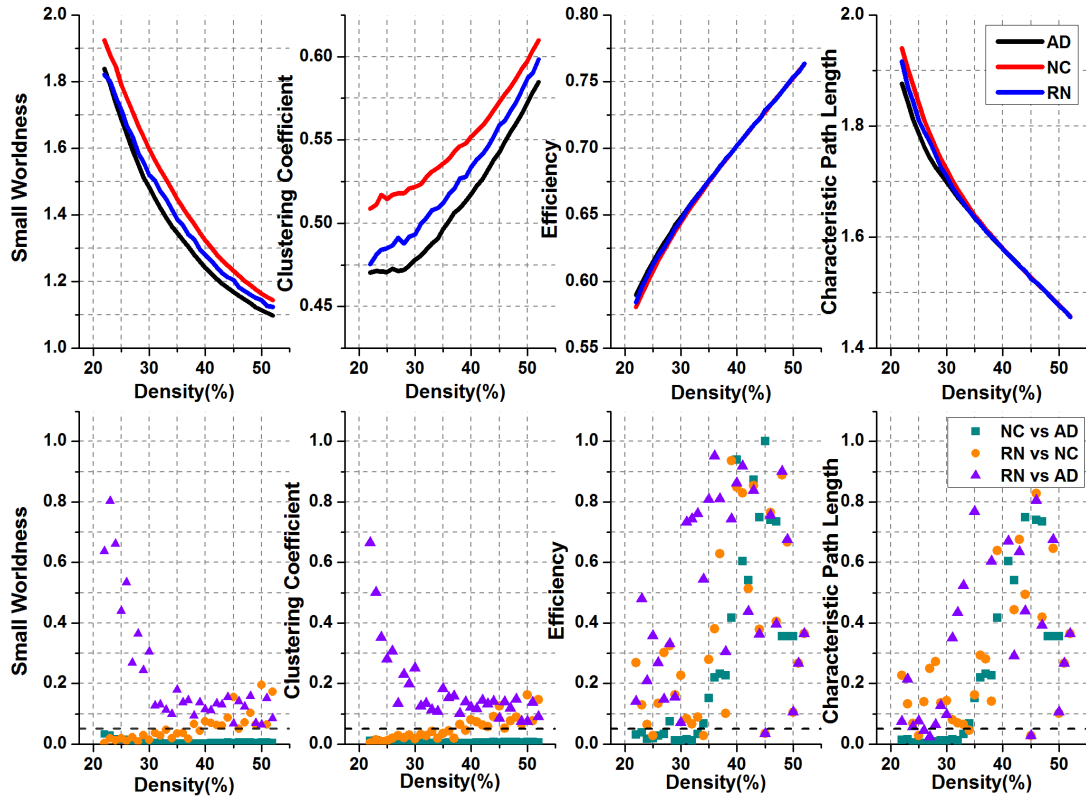

Fig S3

The results of the network attacks are consistent with those in the primary cohort, and support the conclusions in the paper (Fig S4).

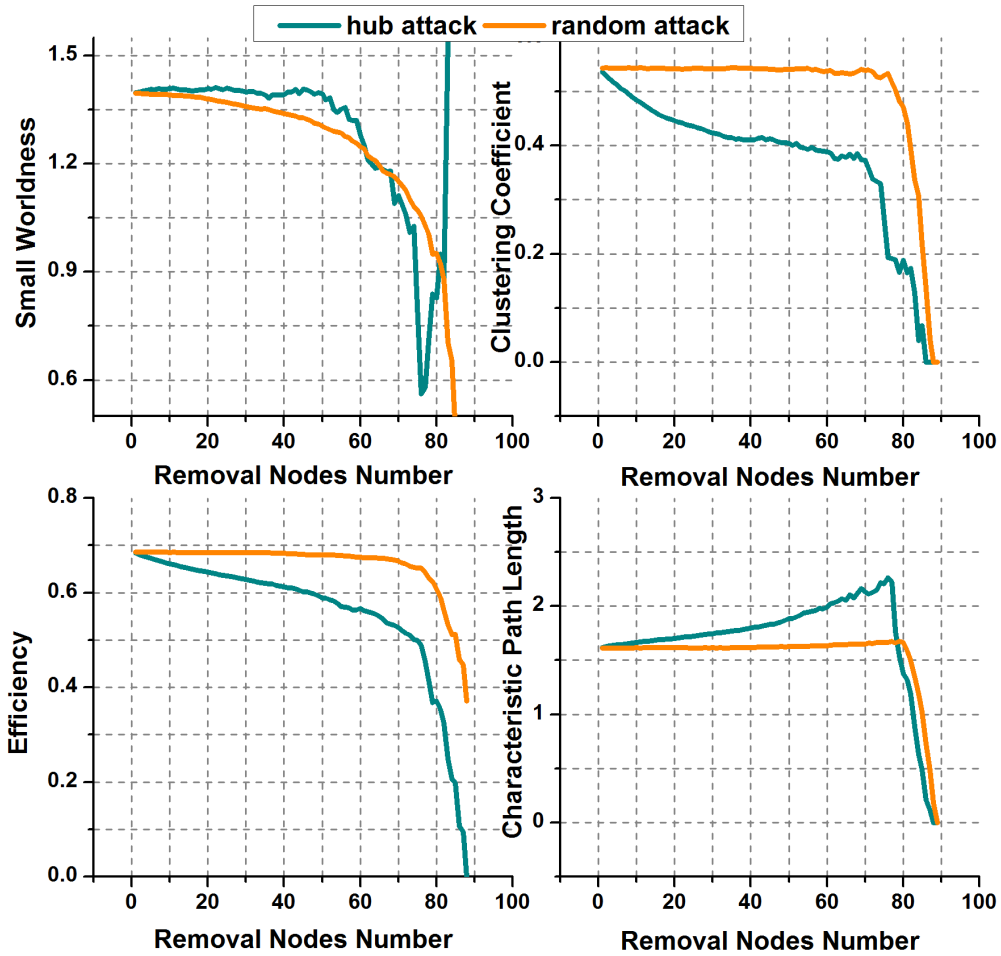

Fig S4

### S5. Experimental results in the independent cohort II

The results (Fig S5-S8) in the independent cohort II were similar to those in the independent cohort I, and thus we do not repeat our prior explanations here.

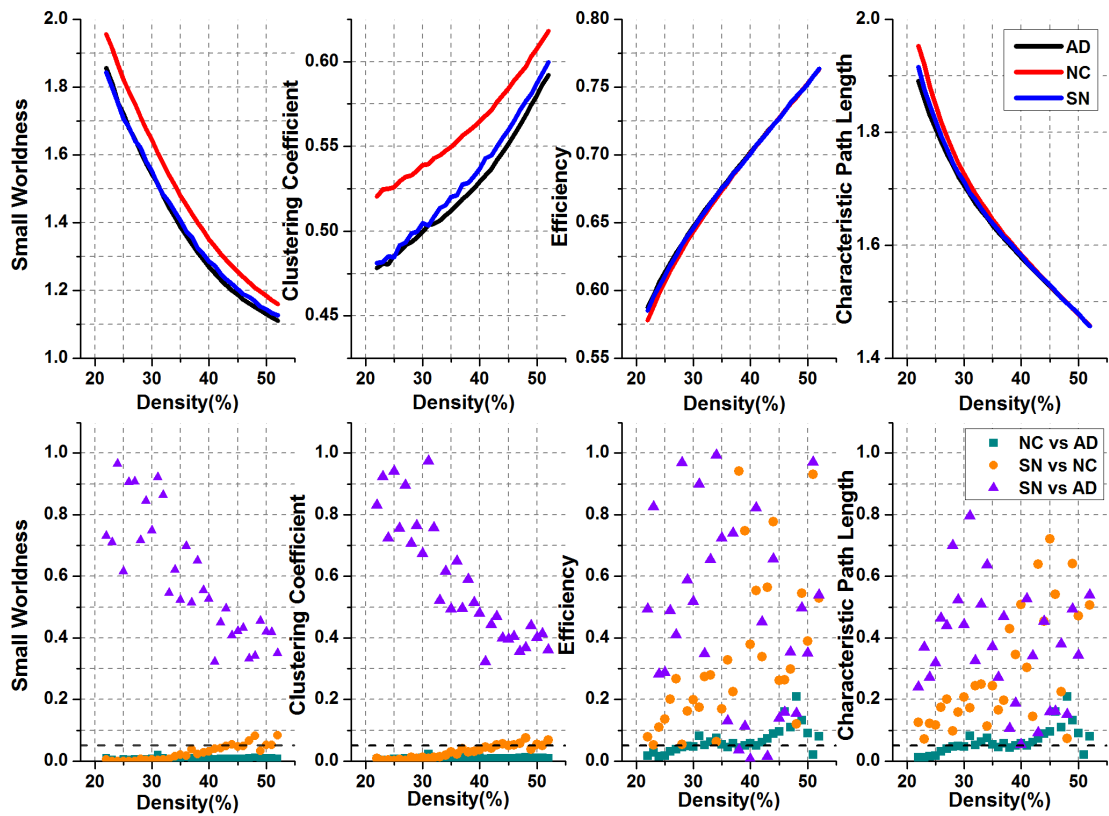

Fig S5

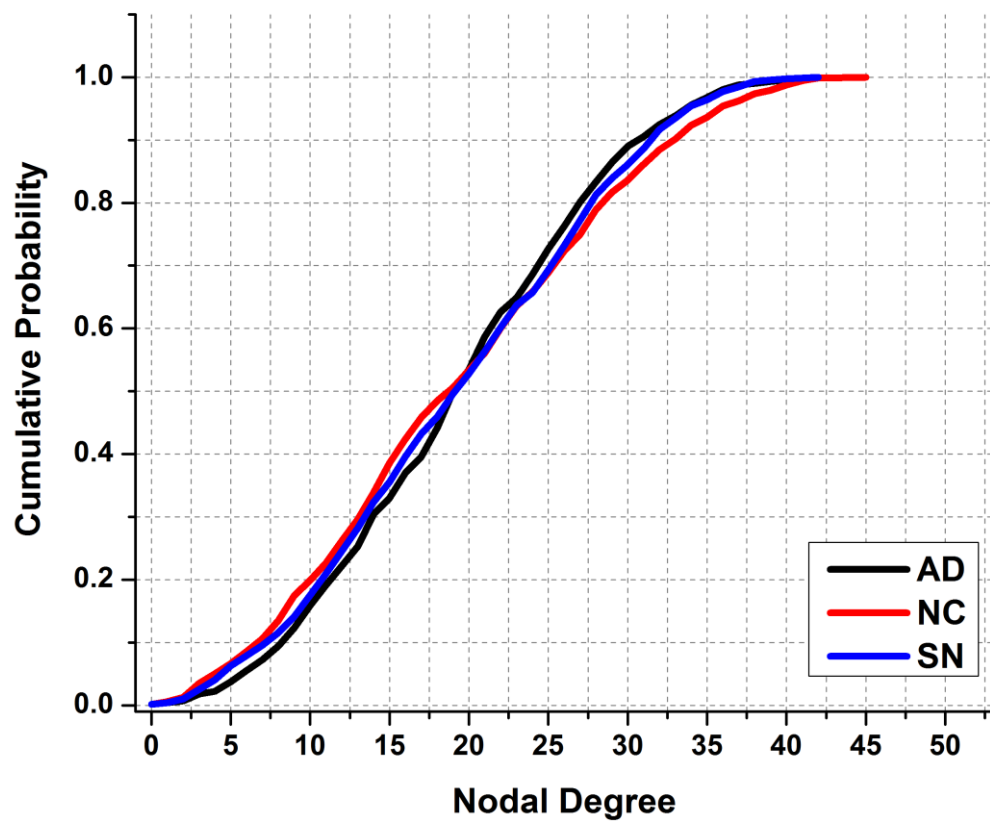

Fig S6



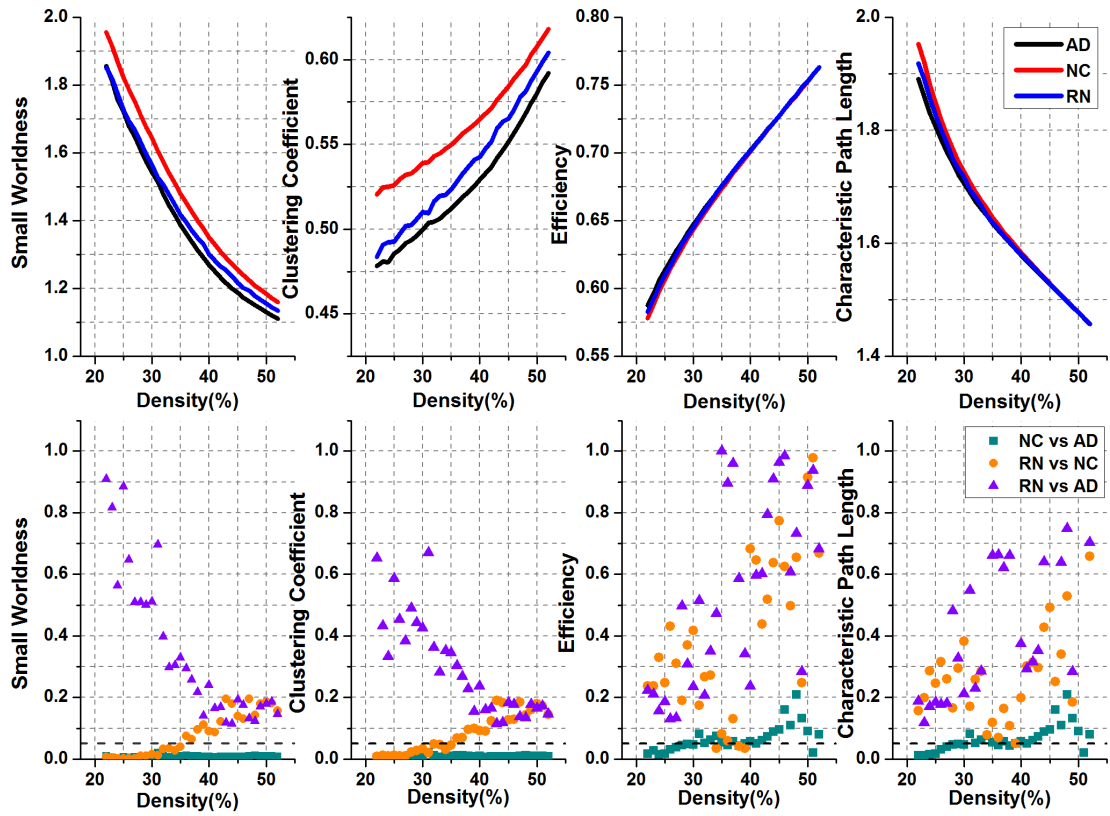

Fig S7

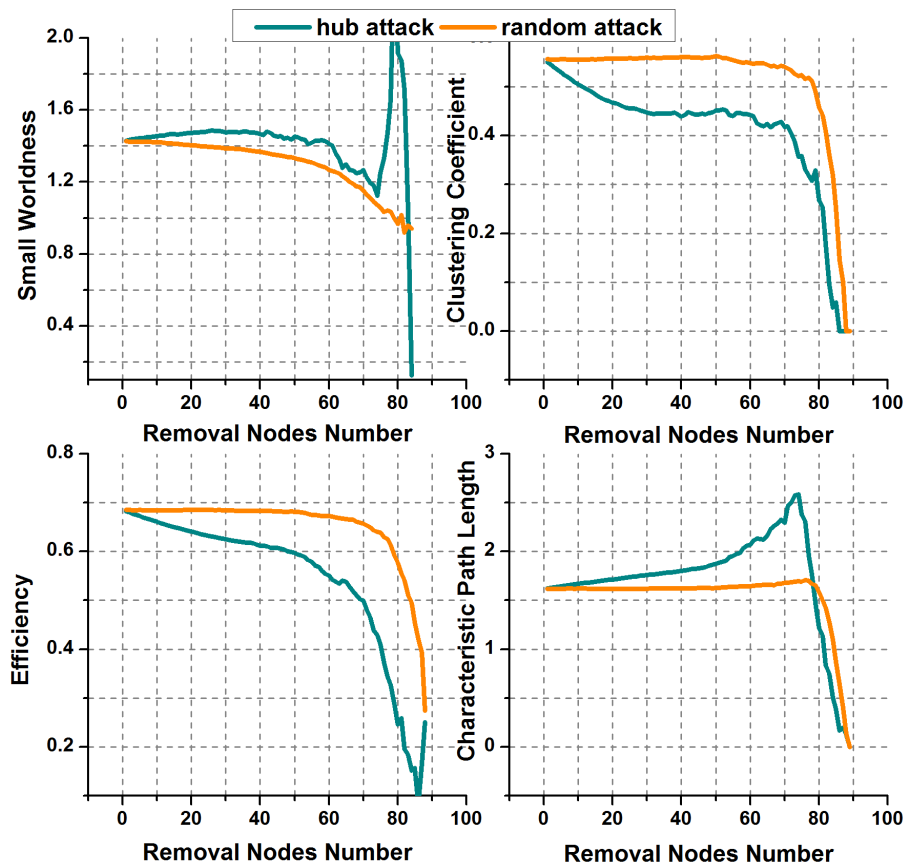

Fig S8
